# Supplementary material for: Influence of Urbanization on Body Size, Condition, and Physiology in an Urban Exploiter: A Multi-Component Approach
Source: PubMed Central journal article supplement (PMC4535910; doi:10.1371/journal.pone.0135685), 2015-08-13
Supplement: pone.0135685.s001.pdf [file pone.0135685.s001.pdf]

# Supporting Data

| Site        | Date       | DayTime | Sex | Age | Tarsus | Wing | Weight | Fat | Muscle | CortA | TimeA | CortB | Hemato |
|-------------|------------|---------|-----|-----|--------|------|--------|-----|--------|-------|-------|-------|--------|
| LaRochelle  | 04/07/2013 | 11:20   | M   | Ad  | 18.9   | 77.0 | 25.1   | 1   | 3      | 4.74  | 3.00  | 31.32 | 0.503  |
| LaRochelle  | 18/07/2013 | 12:03   | F   | Ad  | 18.1   | 77.0 | 28.4   | 2   | 3      | 3.90  | 2.80  | 25.57 | 0.505  |
| LaRochelle  | 18/07/2013 | 10:30   | F   | Ad  | 18.2   | 72.0 | 24.4   | 2   | 3      | 0.83  | 2.23  | 27.87 | 0.465  |
| LaRochelle  | 04/07/2013 | 10:30   | M   | Ad  | 18.5   | 78.0 | 26.9   | 2   | 3      | 15.12 | 3.00  | 41.29 | 0.547  |
| LaRochelle  | 04/07/2013 | 12:10   | M   | Ad  | 17.4   | 75.0 | 24.0   | 1   | 3      | 4.49  | 3.00  | 49.40 | 0.514  |
| LaRochelle  | 19/06/2013 | 11:25   | F   | Ad  | 18.8   | 73.0 | 25.8   | 2   | 3      | 5.30  | 1.83  | 44.82 | 0.560  |
| LaRochelle  | 04/07/2013 | 12:10   | F   | Ad  | 17.5   | 74.0 | 25.9   | 2   | 3      | 14.85 | 3.00  | 41.69 | 0.477  |
| LaRochelle  | 19/06/2013 | 10:35   | M   | Ad  | 16.4   | 77.0 | 25.4   | 1   | 3      | 1.08  | 2.33  | 43.11 | 0.465  |
| LaRochelle  | 04/07/2013 | 10:30   | F   | Ad  | 17.8   | 73.0 | 26.5   | 1   | 2      | 11.16 | 2.90  | 53.04 | 0.452  |
| LaRochelle  | 06/08/2013 | 12:35   | F   | Ad  | 19.3   | 77.0 | 24.2   | 3   | 2      | 0.83  | 2.83  | 25.79 | 0.367  |
| LaRochelle  | 31/07/2013 | 10:45   | F   | Ad  | 17.9   | 74.0 | 24.5   | 2   | 2      | 2.16  | 2.27  | 35.28 | 0.536  |
| LaRochelle  | 31/07/2013 | 11:35   | M   | Ad  | 18.6   | 79.0 | 26.4   | 2   | 2      | 2.22  | 2.33  | 18.06 | 0.439  |
| LaRochelle  | 31/07/2013 | 13:40   | M   | Ad  | 17.0   | 79.0 | 24.9   | 2   | 3      | 0.86  | 2.80  | 14.55 | 0.286  |
| LaRochelle  | 19/06/2013 | 11:40   | M   | Ad  | 18.0   | 77.0 | 26.7   | 1   | 2      | 5.33  | 2.00  | 44.73 | 0.510  |
| LaRochelle  | 19/06/2013 | 11:35   | F   | Ad  | 18.2   | 75.0 | 24.1   | 1   | 1      | 2.70  | 3.00  | 31.67 | 0.388  |
| LaRochelle  | 06/08/2013 | 11:55   | F   | Ad  | 17.4   | 75.0 | 23.8   | 2   | 2      | 3.36  | 3.00  | 29.46 | 0.456  |
| LaRochelle  | 06/08/2013 | 11:30   | F   | Juv | 18.8   | 67.0 | 25.9   | 2   | 3      | 1.13  | 2.37  | 19.58 | 0.429  |
| LaRochelle  | 06/08/2013 | 13:05   | F   | Juv | 18.2   | 71.0 | 22.4   | 2   | 2      | 2.93  | 2.50  | 21.34 | 0.444  |
| LaRochelle  | 06/08/2013 | 09:20   | F   | Juv | 17.7   | 70.0 | 24.3   | 2   | 2      | 0.83  | 2.67  | 24.80 | 0.462  |
| LaRochelle  | 18/07/2013 | 14:02   | M   | Juv | 16.6   | 70.0 | 20.3   | 2   | 2      | 4.43  | 3.00  | 46.18 | 0.450  |
| LaRochelle  | 06/08/2013 | 11:55   | M   | Juv | 17.9   | 72.5 | 21.9   | 2   | 2      | 1.61  | 3.00  | 15.20 | 0.421  |
| LaRochelle  | 06/08/2013 | 14:38   | M   | Juv | 19.0   | 74.0 | 26.1   | 3   | 2      | 0.83  | 2.42  | 16.15 | 0.404  |
| LaRochelle  | 14/08/2013 | 10:43   | F   | Juv | 17.4   | 70.0 | 22.3   | 3   | 2      | 0.83  | 2.70  | 22.76 | 0.456  |
| LaRochelle  | 06/08/2013 | 14:25   | M   | Juv | 17.9   | 72.0 | 25.6   | 3   | 2      | 0.83  | 2.77  | 10.26 | 0.448  |
| LaRochelle  | 21/08/2013 | 11:31   | F   | Juv | 16.2   | 68.0 | 21.0   | 3   | 2      | 4.70  | 2.23  | 30.09 | 0.403  |
| LaRochelle  | 23/08/2013 | 13:50   | F   | Juv | 17.4   | 70.0 | 22.8   | 3   | 2      | 0.93  | 2.23  | 23.19 | 0.407  |
| LaRochelle  | 23/08/2013 | 13:54   | F   | Juv | 17.3   | 67.5 | 23.3   | 2   | 2      | 0.83  | 2.50  | 21.80 | 0.457  |
| Villefollet | 26/05/2013 | 19:22   | F   | Ad  | 20.8   | 71.0 | 29.3   | 1   | 3      | 5.97  | 3.00  | 61.43 | 0.516  |
| Villefollet | 14/07/2013 | 17:55   | M   | Ad  | 17.6   | 74.0 | 25.1   | 1   | 2      | 13.49 | 2.38  | 46.36 | 0.525  |
| Villefollet | 26/05/2013 | 20:15   | F   | Ad  | 18.9   | 76.0 | 30.3   | 2   | 3      | 1.05  | 3.00  | 41.27 | 0.624  |
| Villefollet | 11/06/2013 | 17:40   | M   | Ad  | 20.2   | 79.0 | 27.6   | 2   | 3      | 4.89  | 3.00  | 40.99 | 0.550  |
| Villefollet | 11/06/2013 | 17:05   | M   | Ad  | 20.7   | 78.0 | 30.8   | 2   | 3      | 0.83  | 2.42  | 38.30 | 0.514  |
| Villefollet | 02/06/2013 | 18:20   | M   | Ad  | 19.5   | 77.5 | 29.0   | 2   | 3      | 6.76  | 3.00  | 38.60 | 0.529  |
| Villefollet | 26/05/2013 | 19:20   | M   | Ad  | 19.3   | 76.0 | 26.8   | 1   | 3      | 5.36  | 2.80  | 45.59 | 0.565  |
| Villefollet | 16/06/2013 | 16:30   | F   | Ad  | 19.5   | 77.0 | 28.8   | 1   | 2      | 0.91  | 2.33  | 28.98 | 0.468  |
| Villefollet | 10/08/2013 | 20:10   | M   | Ad  | 19.4   | 78.0 | 30.9   | 2   | 3      | 1.91  | 3.00  | 15.81 | 0.435  |
| Villefollet | 11/08/2013 | 20:00   | M   | Ad  | 18.6   | 76.0 | 29.1   | 2   | 3      | 2.78  | 2.67  | 24.87 | 0.437  |
| Villefollet | 07/07/2013 | 19:35   | M   | Ad  | 19.9   | 80.0 | 27.7   | 2   | 3      | 3.74  | 2.25  | 33.66 | 0.442  |
| Villefollet | 25/07/2013 | 08:53   | M   | Ad  | 18.1   | 78.0 | 28.7   | 2   | 3      | 2.57  | 3.00  | 20.97 | 0.456  |
| Villefollet | 16/06/2013 | 18:25   | M   | Ad  | 19.3   | 79.0 | 28.3   | 1   | 3      | 2.04  | 2.95  | 40.06 | 0.488  |
| Villefollet | 05/08/2013 | 09:40   | F   | Ad  | 19.8   | 74.0 | 28.4   | 1   | 2      | 1.03  | 3.00  | 16.42 | 0.395  |
| Villefollet | 16/06/2013 | 17:40   | M   | Ad  | 18.0   | 74.0 | 25.0   | 1   | 3      | 1.68  | 3.00  | 29.83 | 0.537  |
| Villefollet | 05/08/2013 | 08:32   | F   | Ad  | 18.0   | 72.5 | 24.8   | 1   | 2      | 3.69  | 3.00  | 23.13 | 0.464  |
| Villefollet | 05/08/2013 | 09:35   | F   | Ad  | 19.7   | 74.0 | 25.7   | 1   | 2      | 1.48  | 3.00  | 28.19 | 0.313  |
| Villefollet | 12/08/2013 | 11:10   | F   | Juv | 18.8   | 70.0 | 29.8   | 2   | 2      | 0.83  | 1.67  | 13.80 | 0.400  |
| Villefollet | 19/08/2013 | 09:43   | F   | Juv | 17.9   | 66.0 | 24.5   | 2   | 3      | 1.00  | 2.93  | 20.20 | 0.484  |
| Villefollet | 19/08/2013 | 10:16   | M   | Juv | 18.4   | 72.0 | 23.3   | 2   | 2      | 2.21  | 1.95  | 21.91 | 0.373  |

|             |            |       |   |     |      |      |      |   |   |       |      |       |       |
|-------------|------------|-------|---|-----|------|------|------|---|---|-------|------|-------|-------|
| Villefollet | 16/06/2013 | 18:25 | M | Juv | 18.6 | 76.0 | 26.0 | 2 | 3 | 0.90  | 2.68 | 16.31 | 0.447 |
| Villefollet | 18/08/2013 | 19:01 | F | Juv | 18.3 | 71.5 | 29.6 | 2 | 2 | 2.16  | 1.42 | 15.21 | 0.468 |
| Villefollet | 07/07/2013 | 17:15 | F | Juv | 18.1 | 71.0 | 26.2 | 2 | 2 | 1.87  | 2.95 | 18.06 | 0.472 |
| Villefollet | 21/07/2013 | 19:25 | F | Juv | 17.9 | 74.0 | 24.9 | 2 | 2 | 3.92  | 2.90 | 23.91 | 0.435 |
| Villefollet | 18/08/2013 | 19:30 | M | Juv | 19.1 | 70.0 | 25.2 | 2 | 2 | 0.83  | 1.67 | 18.69 | 0.421 |
| Villefollet | 18/08/2013 | 19:13 | M | Juv | 19.2 | 74.0 | 25.8 | 2 | 2 | 0.83  | 2.67 | 6.57  | 0.458 |
| Niort       | 02/08/2013 | 10:10 | F | Ad  | 18.1 | 74.0 | 26.0 | 2 | 2 | 1.76  | 2.57 | 27.38 | 0.445 |
| Niort       | 02/08/2013 | 12:06 | F | Ad  | 18.6 | 75.0 | 26.0 | 2 | 1 | 9.83  | 2.00 | 28.16 | 0.476 |
| Niort       | 06/06/2013 | 15:50 | M | Ad  | 19.8 | 78.0 | 27.9 | 1 | 2 | 6.37  | 2.53 | 23.45 | 0.528 |
| Niort       | 06/06/2013 | 09:40 | M | Ad  | 18.9 | 78.0 | 27.1 | 1 | 2 | 4.30  | 2.55 | 23.95 | 0.598 |
| Niort       | 09/08/2013 | 13:53 | F | Ad  | 17.5 | 73.0 | 26.6 | 2 | 2 | 9.09  | 1.22 | 19.77 | 0.420 |
| Niort       | 23/05/2013 | 12:27 | M | Ad  | 19.4 | 75.0 | 27.5 | 1 | 2 | 0.83  | 2.00 | 22.66 | 0.523 |
| Niort       | 23/05/2013 | 15:17 | F | Ad  | 19.2 | 76.0 | 28.3 | 1 | 2 | 0.83  | 1.78 | 15.11 | 0.517 |
| Niort       | 02/08/2013 | 11:30 | F | Ad  | 18.6 | 76.0 | 26.4 | 1 | 2 | 3.88  | 2.92 | 30.22 | 0.500 |
| Niort       | 02/08/2013 | 12:04 | M | Ad  | 19.6 | 80.0 | 27.4 | 1 | 2 | 10.70 | 2.50 | 33.27 | 0.471 |
| Niort       | 06/06/2013 | 09:25 | F | Ad  | 17.7 | 76.0 | 26.1 | 1 | 2 | 0.83  | 1.82 | 25.91 | 0.550 |
| Niort       | 20/06/2013 | 13:34 | M | Ad  | 18.6 | 76.0 | 26.9 | 1 | 3 | 0.83  | 2.83 | 20.09 | 0.471 |
| Niort       | 23/05/2013 | 10:45 | F | Ad  | 19.4 | 73.0 | 28.9 | 1 | 2 | 5.36  | 3.00 | 35.69 | 0.504 |
| Niort       | 23/05/2013 | 11:15 | F | Ad  | 18.7 | 74.0 | 29.7 | 2 | 3 | 6.89  | 3.00 | 34.77 | 0.493 |
| Niort       | 02/08/2013 | 10:32 | M | Ad  | 18.4 | 78.0 | 26.7 | 2 | 3 | 0.95  | 2.83 | 10.63 | 0.457 |
| Niort       | 09/08/2013 | 09:50 | F | Ad  | 18.0 | 75.0 | 24.6 | 2 | 2 | 3.75  | 3.00 | 34.73 | 0.553 |
| Niort       | 07/08/2013 | 13:48 | F | Ad  | 17.3 | 72.0 | 25.6 | 2 | 2 | 7.13  | 3.00 | 24.94 | 0.461 |
| Niort       | 02/08/2013 | 12:15 | M | Juv | 18.7 | 73.0 | 25.6 | 3 | 2 | 5.37  | 1.33 | 18.44 | 0.455 |
| Niort       | 01/08/2013 | 14:50 | F | Juv | 18.8 | 72.0 | 24.0 | 3 | 2 | 1.54  | 3.00 | 9.80  | 0.434 |
| Niort       | 13/08/2013 | 11:10 | F | Juv | 18.7 | 71.0 | 21.7 | 2 | 1 | 1.93  | 3.00 | 25.11 | 0.295 |
| Niort       | 29/07/2013 | 12:20 | M | Juv | 18.0 | 71.0 | 26.0 | 3 | 2 | 0.83  | 3.00 | 10.67 | 0.462 |
| Niort       | 29/07/2013 | 12:20 | M | Juv | 17.6 | 71.0 | 22.9 | 3 | 1 | 0.83  | 3.75 | 12.95 | 0.502 |
| Niort       | 29/07/2013 | 16:10 | F | Juv | 18.2 | 72.0 | 23.2 | 3 | 2 | 3.00  | 1.92 | 17.57 | 0.426 |
| Niort       | 09/08/2013 | 11:34 | F | Juv | 17.5 | 71.0 | 24.4 | 2 | 2 | 1.53  | 1.92 | 15.95 | 0.480 |
| Niort       | 13/08/2013 | 11:30 | F | Juv | 18.4 | 73.0 | 24.9 | 2 | 2 | 0.83  | 2.78 | 18.10 | 0.381 |
| Niort       | 16/08/2013 | 12:15 | F | Juv | 17.9 | 72.0 | 25.6 | 2 | 2 | 1.85  | 3.00 | 16.14 | 0.438 |
| Niort       | 05/07/2013 | 16:58 | F | Juv | 17.6 | 71.0 | 23.9 | 2 | 2 | 0.83  | 2.75 | 11.55 | 0.394 |
| CEBC        | 24/07/2013 | 18:50 | M | Ad  | 19.2 | 77.0 | 26.8 | 1 | 2 | 0.83  | 2.57 | 13.07 | 0.362 |
| CEBC        | 24/07/2013 | 14:25 | F | Ad  | 18.2 | 71.0 | 25.6 | 2 | 2 | 5.36  | 3.00 | 44.82 | 0.526 |
| CEBC        | 21/05/2013 | 15:20 | M | Ad  | 19.5 | 79.0 | 28.4 | 2 | 2 | 4.97  | 2.50 | 44.90 | 0.498 |
| CEBC        | 13/05/2013 | 15:40 | M | Ad  | 20.0 | 80.0 | 26.8 | 1 | 2 | 11.81 | 2.83 | 47.52 | 0.384 |
| CEBC        | 23/07/2013 | 14:30 | M | Ad  | 18.9 | 78.0 | 26.3 | 1 | 3 | 14.76 | 2.00 | 58.84 | 0.456 |
| CEBC        | 22/07/2013 | 17:43 | M | Ad  | 17.9 | 77.0 | 27.6 | 1 | 2 | 1.71  | 3.00 | 21.03 | 0.471 |
| CEBC        | 21/05/2013 | 15:40 | F | Ad  | 19.7 | 76.0 | 28.2 | 1 | 2 | 4.31  | 3.00 | 69.76 | 0.483 |
| CEBC        | 15/05/2013 | 14:35 | F | Ad  | 17.9 | 76.0 | 26.2 | 2 | 3 | 5.17  | 2.87 | 56.40 | 0.449 |
| CEBC        | 06/06/2013 | 15:30 | F | Ad  | 19.0 | 76.0 | 28.4 | 1 | 2 | 4.84  | 2.83 | 41.81 | 0.544 |
| CEBC        | 21/05/2013 | 15:45 | F | Ad  | 19.8 | 77.0 | 28.5 | 1 | 2 | 8.02  | 3.00 | 28.86 | 0.403 |
| CEBC        | 04/06/2013 | 16:20 | M | Ad  | 19.4 | 76.0 | 27.5 | 1 | 3 | 8.17  | 3.08 | 37.38 | 0.527 |
| CEBC        | 27/07/2013 | 15:50 | M | Ad  | 17.2 | 78.0 | 26.6 | 2 | 3 | 4.33  | 2.92 | 21.77 | 0.500 |
| CEBC        | 24/05/2013 | 14:56 | M | Ad  | 19.9 | 80.0 | 31.5 | 1 | 3 | 3.98  | 2.43 | 47.80 | 0.495 |
| CEBC        | 25/06/2013 | 15:45 | F | Ad  | 19.5 | 76.0 | 30.6 | 2 | 2 | 6.16  | 2.88 | 40.63 | 0.500 |
| CEBC        | 27/06/2013 | 16:35 | F | Ad  | 20.0 | 74.0 | 30.2 | 2 | 2 | 2.89  | 3.00 | 36.63 | 0.463 |
| CEBC        | 04/06/2013 | 15:10 | F | Ad  | 19.4 | 74.0 | 27.5 | 1 | 2 | 1.34  | 2.27 | 39.39 | 0.475 |
| CEBC        | 12/06/2013 | 09:40 | F | Ad  | 19.4 | 75.0 | 29.3 | 1 | 3 | 2.69  | 2.00 | 63.94 | 0.500 |
| CEBC        | 23/07/2013 | 19:15 | M | Ad  | 19.5 | 77.0 | 28.6 | 2 | 3 | 1.37  | 3.00 | 42.22 | 0.461 |
| CEBC        | 06/06/2013 | 11:25 | F | Ad  | 18.2 | 72.5 | 27.6 | 1 | 2 | 7.37  | 2.80 | 36.38 | 0.449 |
| CEBC        | 11/07/2013 | 15:50 | F | Juv | 17.5 | 71.0 | 22.8 | 1 | 2 | 1.31  | 3.00 | 33.66 | 0.436 |
| CEBC        | 22/07/2013 | 18:34 | M | Juv | 18.0 | 71.0 | 26.1 | 2 | 3 | 0.83  | 3.00 | 16.87 | 0.518 |

|      |            |       |   |     |      |      |      |   |   |      |      |       |       |
|------|------------|-------|---|-----|------|------|------|---|---|------|------|-------|-------|
| CEBC | 19/07/2013 | 15:24 | F | Juv | 18.4 | 70.0 | 25.7 | 1 | 3 | 3.27 | 2.78 | 17.48 | 0.313 |
| CEBC | 22/07/2013 | 18:59 | M | Juv | 18.2 | 71.0 | 23.9 | 2 | 2 | 0.83 | 2.50 | 21.45 | 0.428 |
| CEBC | 13/08/2013 | 20:22 | M | Juv | 18.8 | 72.0 | 26.0 | 2 | 2 | 2.22 | 3.00 | 28.73 | 0.427 |
| CEBC | 13/08/2013 | 19:23 | F | Juv | 18.5 | 72.0 | 26.7 | 2 | 2 | 1.23 | 3.00 | 25.24 | 0.448 |
| CEBC | 15/08/2013 | 19:56 | M | Juv | 18.0 | 70.0 | 24.2 | 1 | 2 | 0.83 | 2.08 | 22.37 | 0.406 |
| CEBC | 15/08/2013 | 20:16 | M | Juv | 17.6 | 67.0 | 25.1 | 2 | 2 | 1.59 | 2.33 | 29.64 | 0.443 |
| CEBC | 05/08/2013 | 18:50 | F | Juv | 19.2 | 71.0 | 25.6 | 2 | 2 | 1.78 | 3.00 | 29.13 | 0.500 |
| CEBC | 05/08/2013 | 18:50 | F | Juv | 18.1 | 71.0 | 26.3 | 2 | 3 | 1.12 | 3.00 | 30.91 | 0.455 |
| CEBC | 22/07/2013 | 19:11 | M | Juv | 18.2 | 70.0 | 24.2 | 2 | 2 | 0.83 | 3.00 | 17.36 | 0.254 |
| CEBC | 13/08/2013 | 20:33 | M | Juv | 18.1 | 71.0 | 25.5 | 2 | 2 | 0.96 | 3.00 | 18.12 | 0.467 |
